# Supplementary material
Source: publisher site journal article supplement (https://study.sagepub.com/sites/default/files/08%20Bloomberg%203e%20Appendix%20O.pdf)
Supplement: Supplementary file 1 [file 08%20Bloomberg%203e%20Appendix%20O.pdf]

## Appendix O. Sample Survey for Demographic Data

---

Thank you for agreeing to participate in this study! Please complete the survey below and return it in the attached self-addressed, stamped envelope.

Please note that the information collected in this questionnaire is completely confidential and will only be used for the purposes of this research study.

### Demographic Data Sheet

1. My gender is: \_\_\_\_\_ Female \_\_\_\_\_ Male
2. My age is: \_\_\_\_\_ 23–30 \_\_\_\_\_ 31–40 \_\_\_\_\_ 41–50 \_\_\_\_\_ 50+
3. Occupation: \_\_\_\_\_
4. University (specify program and department): \_\_\_\_\_
5. Discipline/area of research: \_\_\_\_\_
6. Years in doctoral program to date: \_\_\_\_\_
7. Purpose for enrollment in a doctoral program:  
\_\_\_\_\_  
\_\_\_\_\_  
\_\_\_\_\_  
\_\_\_\_\_

Thank you for completing this questionnaire! Your time and participation are very much appreciated and will contribute to a growing knowledge base on experiences surrounding a doctoral dissertation.
